# Supplementary material for: Fenofibrate increases very-long-chain sphingolipids and improves blood glucose homeostasis in NOD mice
Source: PubMed Central journal article supplement (PMC6861358; doi:10.1007/s00125-019-04973-z), 2019-08-13
Supplement: 125_2019_4973_MOESM2_ESM.pdf [file 125_2019_4973_MOESM2_ESM.pdf]

## Electronic Supplementary Material

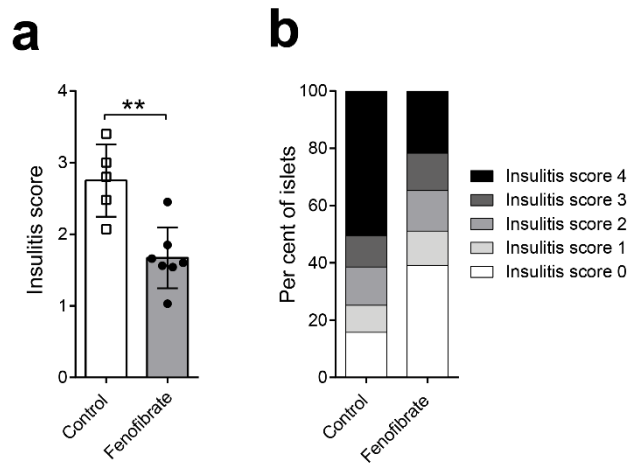

**ESM Fig. 1** Fenofibrate reduces insulinitis score. **(a)** Average insulinitis score in 13-week-old NOD mice on a scale from 0 (no insulinitis) to 4 (above 50% infiltration). **(b)** Percentage distribution of insulinitis levels. Data are shown as means  $\pm$  SD; Control  $n=5$ , Fenofibrate  $n=7$ ; \*\* $p<0.01$  by two-tailed unpaired Student's  $t$  test

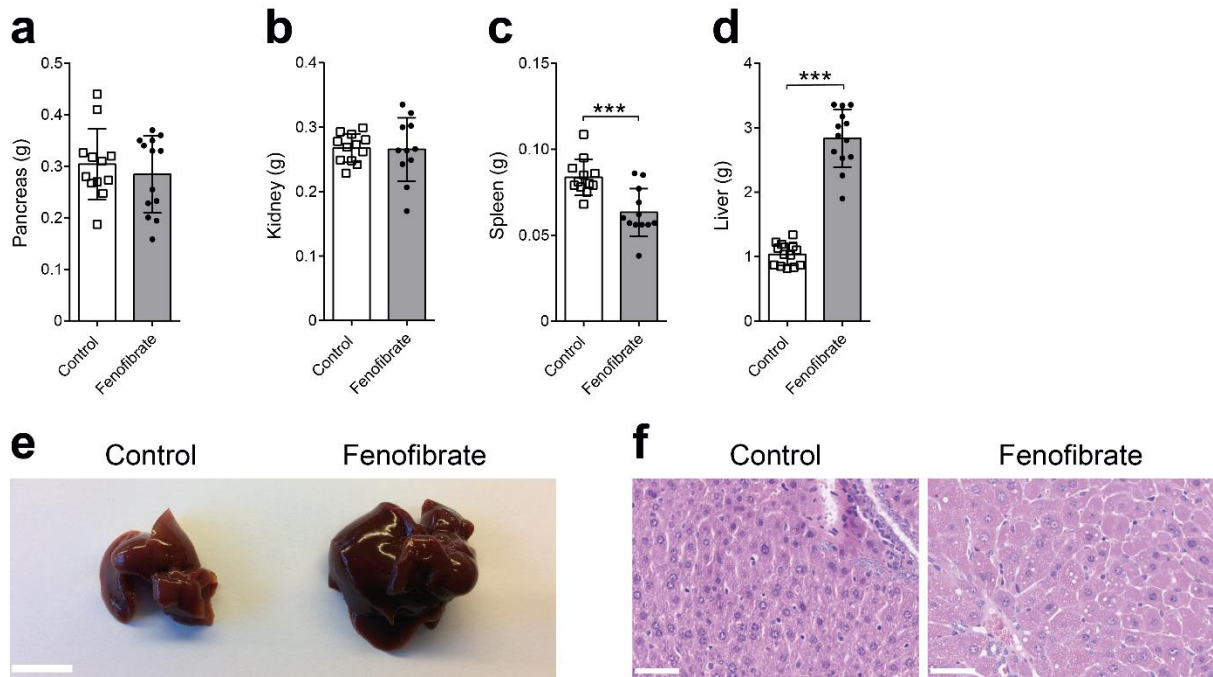

**ESM Fig. 2** Fenofibrate induces liver hypertrophy. Organ weight was measured in 13-week-old mice, **(a)** Pancreas, **(b)** Kidney (right + left) and **(c)** Spleen. **(e)** Image showing the size of a standard liver as found in the two groups. Scale bar 1cm. **(f)** H&E stained liver showing enlarged cells in fenofibrate-treated mice. Scale bar 50 $\mu$ m. Data are shown as means  $\pm$  SD. Control,  $n=12$ ; fenofibrate,  $n=13$  in **(a)**. Control,  $n=12$ ; fenofibrate,  $n=11$  in **(b)**.  $n=12$  in **(c)**.  $n=13$  in **(d)**. \*\*\* $p<0.001$  by two-tailed unpaired Student's  $t$  test

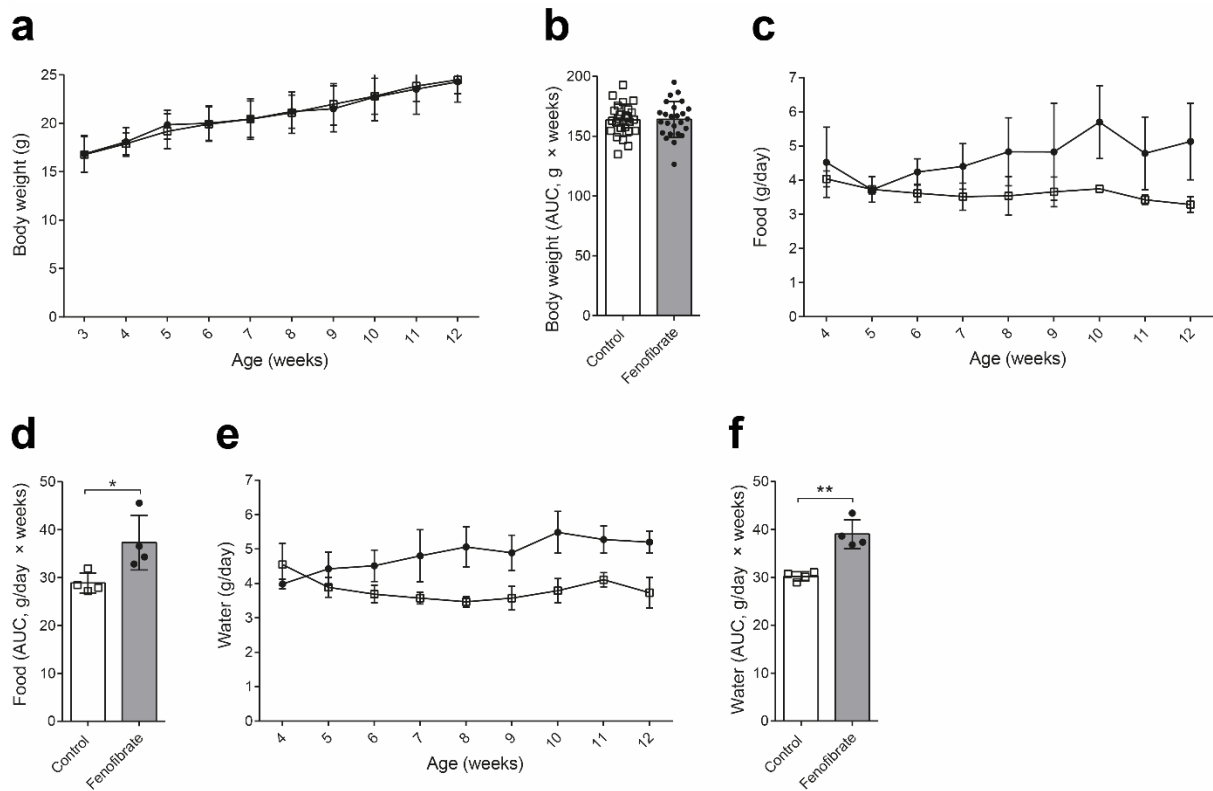

**ESM Fig. 3** Fenofibrate increases food and water intake without affecting body weight. **(a)** Body weight as measured once a week in healthy NOD mice. **(b)** Body weight area under the curve (AUC) calculation. **(c)** Food intake was calculated per cage by weighing the food racks. **(d)** AUC calculation for food intake. **(e)** Water intake as calculated per cage weighing the water flasks. **(f)** AUC calculation for water intake. White squares represent control and black circles represent fenofibrate-treated mice. Data are shown as means  $\pm$  SD.  $n=15$  in **(a, b)**.  $n=4$  **(c, d, e, f)**. \* $p<0.05$ . \*\* $p<0.01$  by two-tailed unpaired Student's  $t$  test
